reverted to normal with reinfusion. This was associated with a 50 per cent increase in minute ventilation. Three times as much air was ventilated to exchange 100 ml of oxygen during shock as during the control period. The mechanics of ventilation were also altered. During the shock period, the ventilatory work increased, due to a combination of increased respiratory rate and increased ventilatory pressure. Although gas exchange returned to normal with reinfusion, the increase in minute ventilation and ventilatory work and the decrease in ventilatory efficiency persisted during the follow-up period. This may be due to an acute congestive process causing postcapillary venous constriction. (Cook, W. A., and Webb, W. R.: *Pulmonary Changes in Hemorrhagic Shock, Surgery* 64: 85 (July) 1968.)

**SHOCK** Interstitial fluid pressure measured in chronically implanted perforated chambers in dogs was always negative. After a period of hypotensive shock, interstitial fluid pressure remained low and was not restored to normal by replacement of the shed blood alone. The addition of 5 per cent of weight with lactated Ringer's solution restored interstitial fluid pressure to normal. The use of clinical dextran or low-molecular-weight dextran instead of lactated Ringer's solution after a period of hypotensive shock lowered interstitial fluid pressure further. The survival rates of dogs treated by blood replacement plus lactated Ringer's solution or plus dextran were the same, suggesting that increased tissue perfusion and oxygen consumption are more important than replacement of "extracellular fluid losses" in the treatment of hypotensive shock. (Hopkinson, B. R., and others: *Interstitial Fluid Pressure Changes during Hemorrhage and Blood Replacement with and without Hypotension, Surgery* 64: 68 (July) 1968.)

**VASOACTIVE AGENTS** Vasoactive agents augment, mimic or modify the action of neurohumoral transmitters released at the ganglia or effector cells. Ganglionic blocking agents do not prevent the release of acetylcholine at preganglionic nerve endings, but block the receptor sites and prevent postjunctional nerve action potential. Methyldopa, reserpine and

chlorpromazine block storage of norepinephrine and eliminate mobile and fixed stores in sympathetic ganglion cells and adrenal medulla. The strongest alpha-receptor-stimulating agent is angiotensin II, and it also is a powerful stimulant for secretion of aldosterone. Both alpha-blocking and beta-stimulating agent have been advocated for treatment of shock, along with adequate replacement of blood volume. Nearly-pure beta-receptor blocking agents are used to treat cardiac arrhythmias, but these drugs may cause bradycardia and arterial hypotension. (McQuarrig, D. G., and Humphrey, E. W.: *Vasopressors and Vasodilators in Surgery, Surg. Clin. N. Amer* 48: 877 (Aug.) 1968.)

### Respiration

**OXYGEN AND CORONARY FLOW** Studies in open-chest dogs were undertaken to assess the effects of abrupt changes in inspired oxygen tensions on the relationship between isometric systolic tension and coronary flow. Changing the inspired oxygen concentration from 25 to 100 per cent resulted in consistent and equivalent reductions in isometric systolic tension and coronary flow, with alterations in coronary flow preceding those of isometric systolic tension. These changes were not abolished by alpha, beta, or complete sympathetic blockade. Although the alterations in coronary flow and isometric systolic tension were similar in both direction and magnitude, they were not related in a cause-and-effect manner. Experiments in which coronary flow was maintained constant by pump perfusion showed that, when O<sub>2</sub> tension was increased, isometric systolic tension decreased in the same degree as previously. These data support the view that alterations in coronary flow are not entirely dependent on myocardial oxygen demands but that there is some intrinsic component of the coronary vessels sensitive to alterations in O<sub>2</sub> tensions. The observed decrease in isometric systolic tension at high O<sub>2</sub> tensions may be an early manifestation of oxygen toxicity. (Daniell, H. B., and Bagwell, E. E.: *Effects of High Oxygen on Coronary Flow and Heart Force, Amer. J. Physiol.* 214: 1454 (June) 1968.)
